# Supplementary figures and images for: A 15-DNA Repair Gene Prognostic Signature for Immunotherapy in Gastric Cancer
Source: Preprints.org preprint supplement (doi:10.20944/preprints202110.0297.v1), 2021-10-20

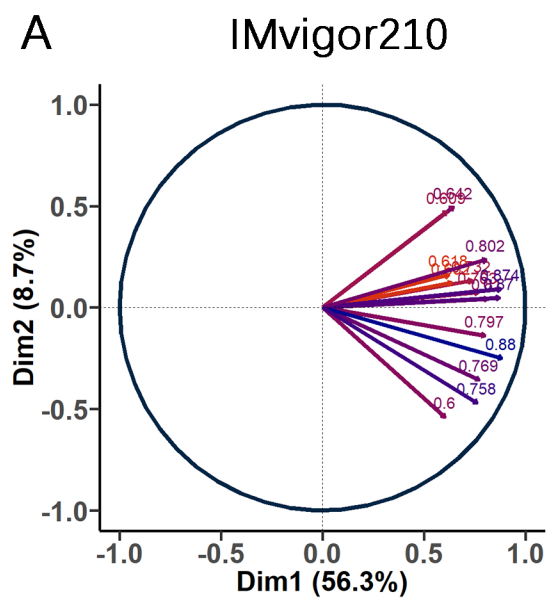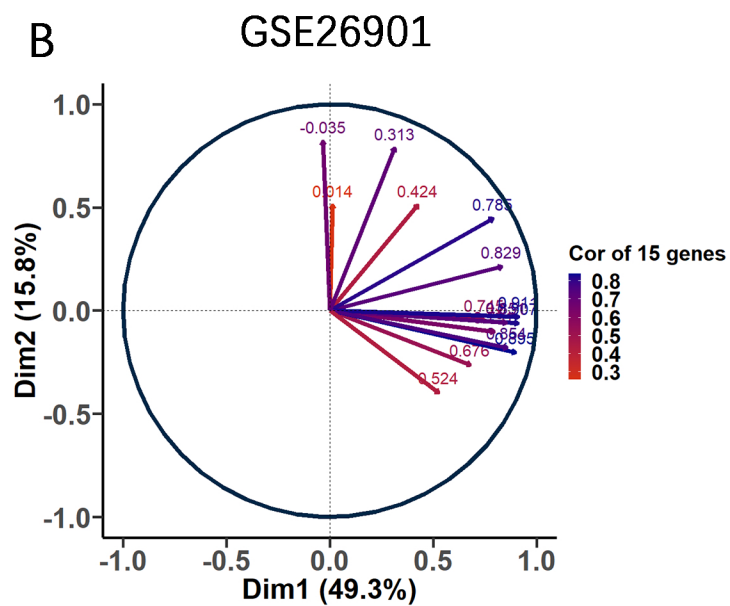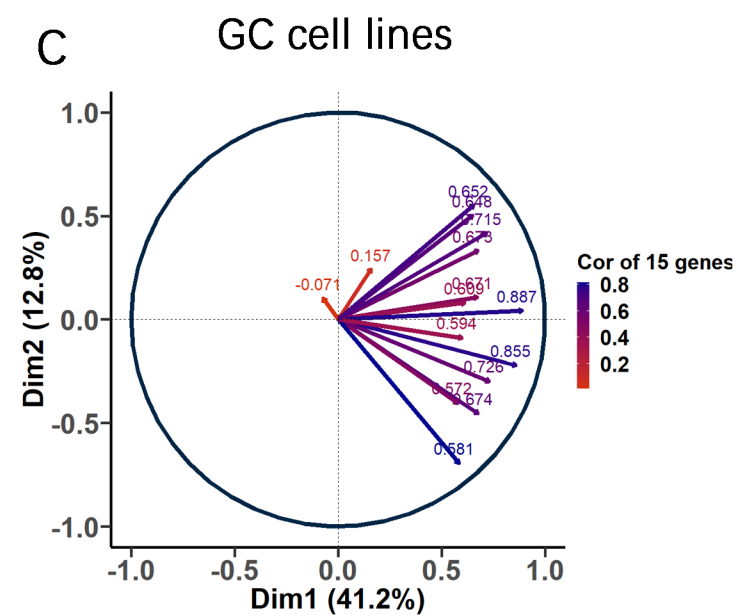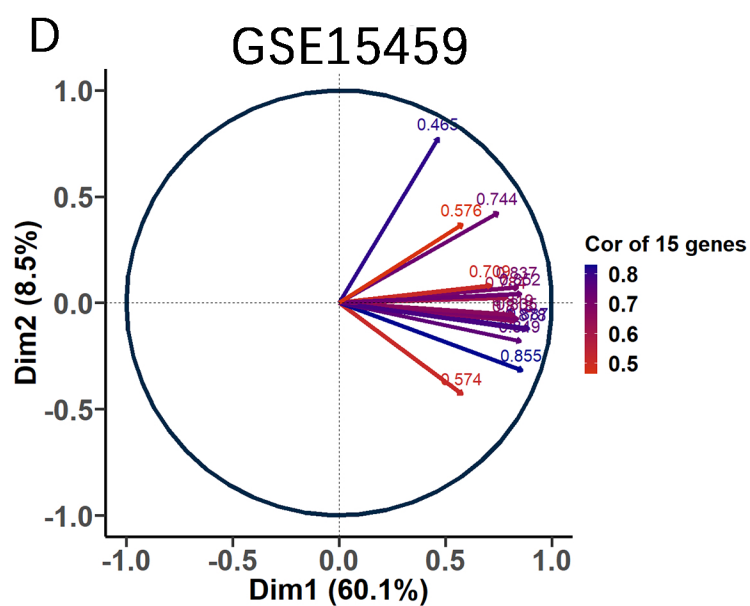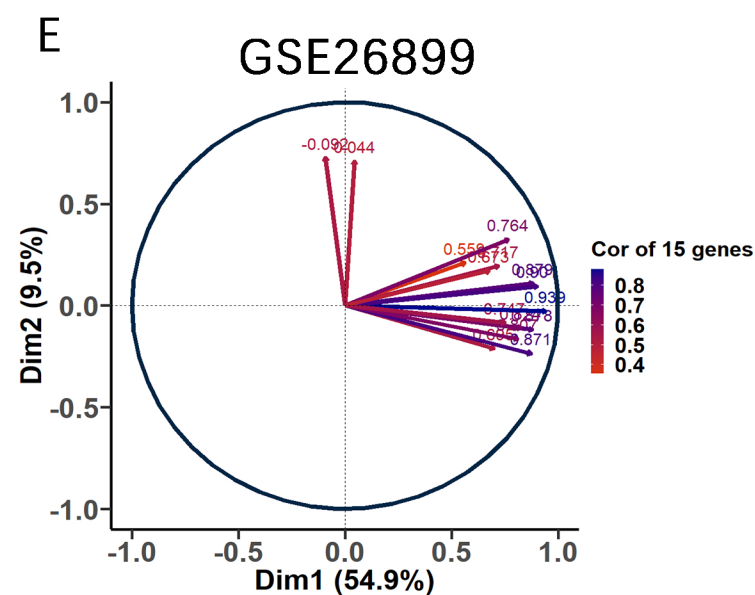

Supplement: Supplementary file 3 [file supplementary]

A

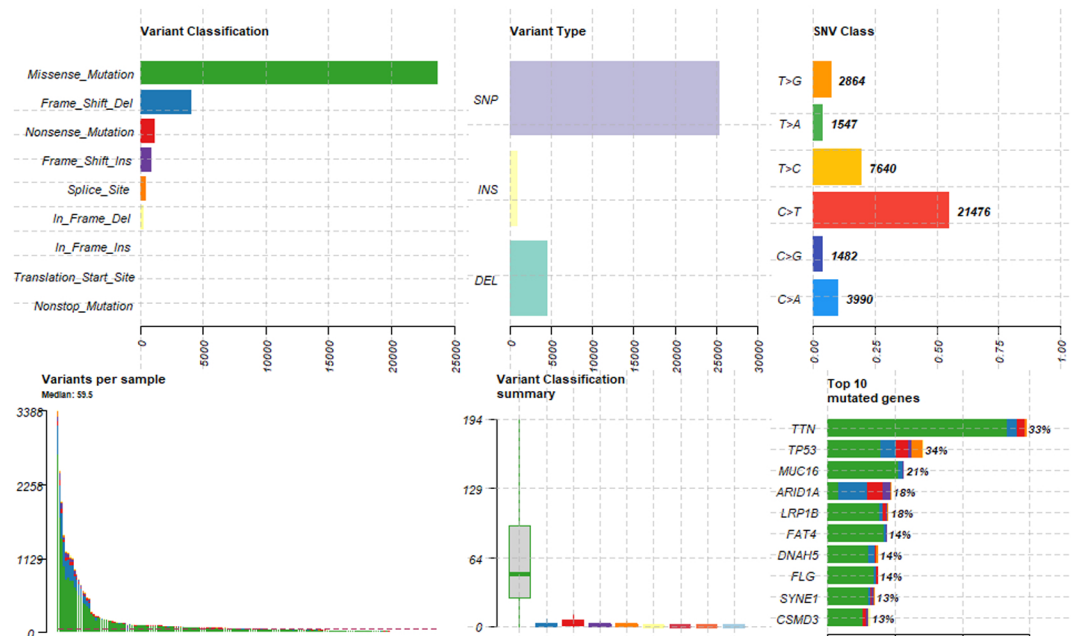

Altered in 128 (71.11%) of 180 samples.

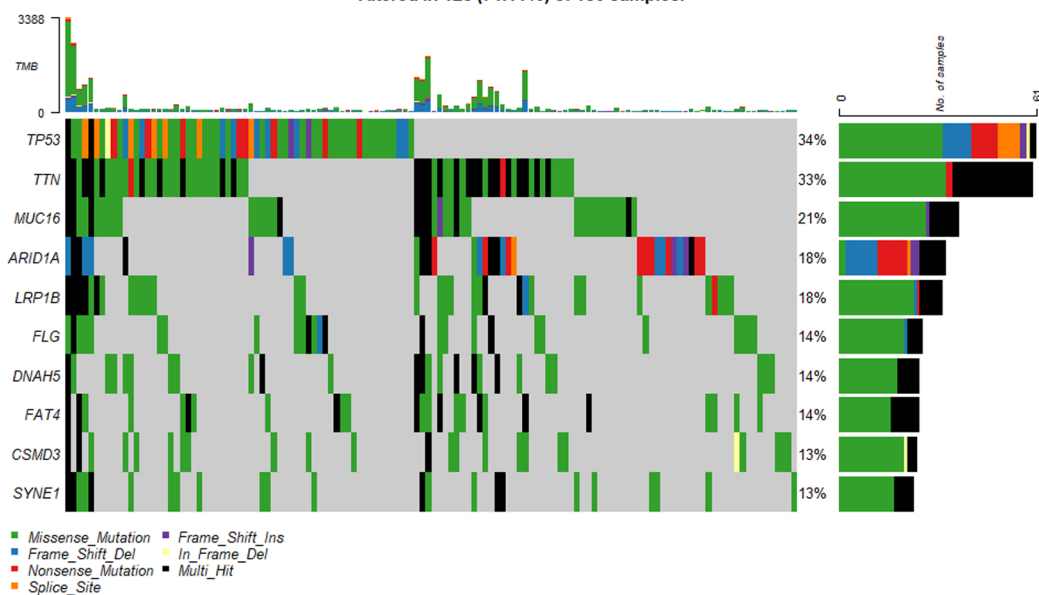

B

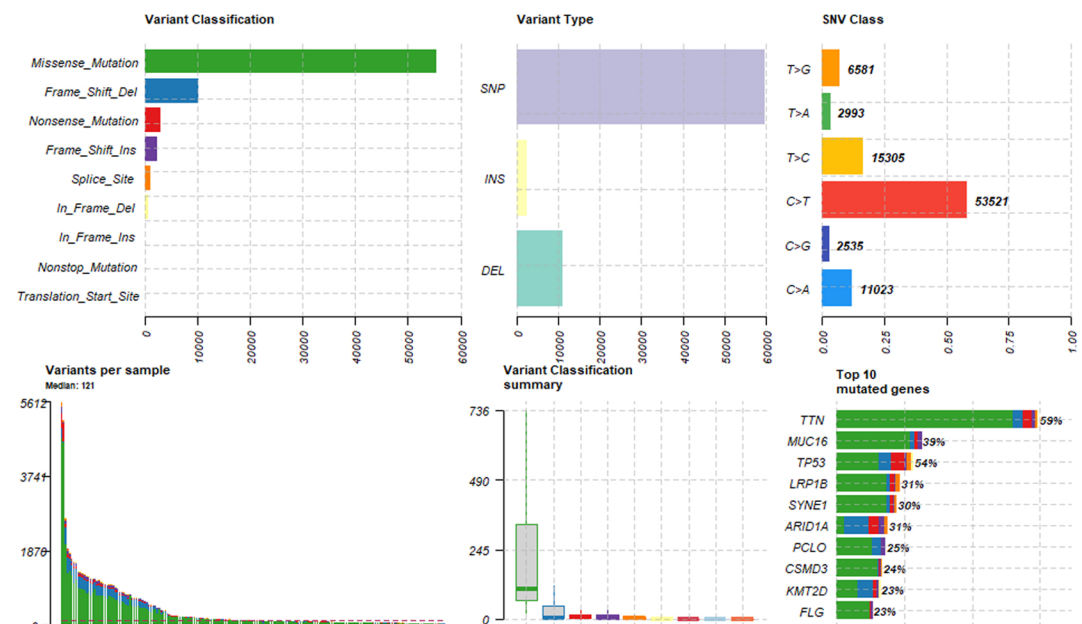

Altered in 180 (97.3%) of 185 samples.

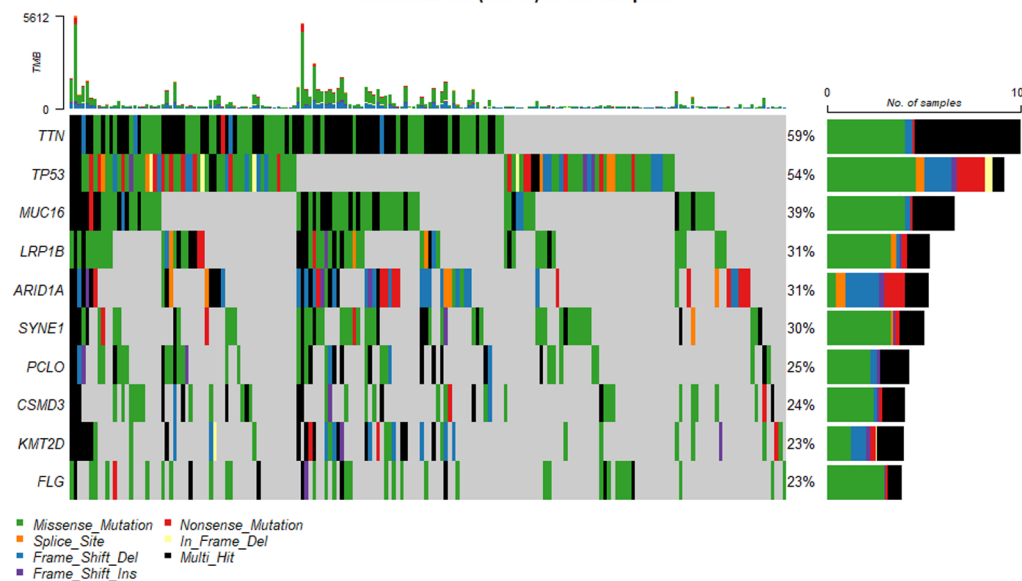

Supplement: Supplementary file 4 [file supplementary]
